# Supplementary material for: Activity of acetyl-CoA carboxylase is not directly linked to accumulation of lipids when Chlorella vulgaris is co-immobilised with Azospirillum brasilense in alginate under autotrophic and heterotrophic conditions
Source: Springer Nature journal article supplement (doi:10.1007/s13213-014-0866-3), 2014-04-08
Supplement: MOESM1 [file 13213_2014_866_MOESM1_ESM.doc]

**Table S1** Statistical evaluation of total lipids content of immobilised *Chlorella vulgaris* and *Azospirillum brasilense* alone and combined, with and without ammonium starvation and under autotrophic and heterotrophic conditions. Comparison were done separately per culture or per cell for each pair of variables using Student’s *t*-test at *P* < 0.05

| Autotrophic; per culture (µgg–1) | | |
| --- | --- | --- |
|  | With 90 mg NH4+ | Without NH4+ |
| *Azospirillum* alone | 164.088 *b* | 1264.93 *a* |
| *Chlorella* alone | 807.84 *b* | 1829.15 *a* |
| Co-immobilisation | 944.76 *b* | 10052.85 *a* |

| Autotrophic; per cell [(µgg–1) cell–1] | | |
| --- | --- | --- |
|  | With 90 mg NH4+ | Without NH4+ |
| *Chlorella* alone | 8.22–4 *b* | 21.32–4 *a* |
| Co-immobilisation | 10.86–4 *b* | 20.11–3 *a* |

| Heterotrophic; per culture (µgg–1) | | |
| --- | --- | --- |
|  | With 90 mg NH4+ | Without NH4+ |
| *Azospirillum* alone | 241.12 *b* | 426.62 *a* |
| *Chlorella* alone | 2188.55 *a* | 982.95 *b* |
| Co-immobilisation | 2460.15 *a* | 970.95 *b* |

| Heterotrophic; per cell [(µgg–1) cell–1] | | |
| --- | --- | --- |
|  | With 90 mg NH4+ | Without NH4+ |
| *Chlorella* alone | 8.48–4 *a* | 6.73–4 *b* |
| Co-immobilisation | 10.04–4 *a* | 10.04–4 *a* |
