# Supplementary material for: Activity of acetyl-CoA carboxylase is not directly linked to accumulation of lipids when Chlorella vulgaris is co-immobilised with Azospirillum brasilense in alginate under autotrophic and heterotrophic conditions
Source: Springer Nature journal article supplement (doi:10.1007/s13213-014-0866-3), 2014-04-08
Supplement: MOESM2 [file 13213_2014_866_MOESM2_ESM.doc]

**Table S2** Statistical evaluation of ACCase activity of immobilised *Chorella vulgaris* and *Azospirillum brasilense* alone and combined, with and without ammonium starvation under autotrophic and heterotrophic conditions. Comparison were done separately per culture or per cell for each pair of variables using Student’s *t*-test at *P* < 0.05

| Autotrophic; per culture (nmolmin–1mL–1) | | |
| --- | --- | --- |
|  | With 90 mg NH4+ | Without NH4+ |
| *Azospirillum* alone | 0.0198 *a* | 0.0130 *a* |
| *Chlorella* alone | 0.0195 *a* | 0.0070*a* |
| Co-immobilisation | 0.1825 *a* | 0.0108 *b* |

| Autotrophic; per cell [(nmolmin–1mL–1) cell–1] | | |
| --- | --- | --- |
|  | With 90 mg NH4+ | Without NH4+ |
| *Chlorella* alone | 1.98–8 *a* | 0.816–8 *a* |
| Co-immobilisation | 2.23–7 *a* | 2.17–8 *b* |

| Heterotrophic; per culture (nmolmin–1mL–1) | | |
| --- | --- | --- |
|  | With 90 mg NH4+ | Without NH4+ |
| *Azospirillum* alone | 0.00 *a* | 0.00 *a* |
| *Chlorella* alone | 0.0727 *a* | 0.0041 *a* |
| Co-immobilisation | 0.0187 *a* | 0.0174 *a* |

| Heterotrophic; per cell [(nmolmin–1mL–1) cell–1] | | |
| --- | --- | --- |
|  | With 90 mg NH4+ | Without NH4+ |
| *Chlorella* alone | 2.82–8 *a* | 2.81–9 *b* |
| Co-immobilisation | 7.95–9 *b* | 1.70–8 *a* |
